# Supplementary material
Source: PubMed Central journal article supplement (PMC8120068)
Supplement: sj-pdf-1-vdi-10.1177_1040638721992057.pdf [file sj-pdf-1-vdi-10.1177_1040638721992057.pdf]

JVDI: Supplementary material

Becher A, et al. Blood neutrophil-to-lymphocyte ratio (NLR) as a diagnostic marker in dogs with chronic enteropathy

**Supplementary Table 1.** Study questionnaire for owners of 65 dogs with chronic enteropathy (CE). Information obtained from dogs included in the first part of the study (I.a–c) consisted of a canine CE clinical activity index (CCECAI)<sup>1</sup> sheet to assess each dog’s CCECAI score, and an owner questionnaire to obtain a thorough medical history of the dog. Both study forms were combined into one table.

|                                                                                                                                                                        |                              |                               |                               |
|------------------------------------------------------------------------------------------------------------------------------------------------------------------------|------------------------------|-------------------------------|-------------------------------|
| <b>Study ID:</b> _____                                                                                                                                                 |                              | <b>Submission date:</b> _____ |                               |
| <b>Patient</b>                                                                                                                                                         |                              |                               |                               |
| Name of your dog: _____                                                                                                                                                |                              |                               |                               |
| Age/DOB: _____ / _____                                                                                                                                                 |                              | Weight (in lbs.): _____       |                               |
| Breed: _____                                                                                                                                                           |                              |                               |                               |
| Sex (mark as appropriate): <input type="checkbox"/> male <input type="checkbox"/> male neutered <input type="checkbox"/> female <input type="checkbox"/> female spayed |                              |                               |                               |
| <b>Owner</b>                                                                                                                                                           |                              |                               |                               |
| Name: _____                                                                                                                                                            |                              |                               |                               |
| Contact information: _____                                                                                                                                             |                              |                               |                               |
| <b>Canine chronic enteropathy clinical activity index (CCECAI) score</b>                                                                                               |                              |                               |                               |
| Clinic/Hospital: _____                                                                                                                                                 |                              | Dog evaluated by: _____       |                               |
| Date of evaluation: _____                                                                                                                                              |                              |                               |                               |
| <b>Evaluation of:</b>                                                                                                                                                  | <b>Score (please circle)</b> |                               | <b>Specify, if applicable</b> |
| <b>Attitude/activity</b>                                                                                                                                               | 0                            | normal                        |                               |
|                                                                                                                                                                        | 1                            | slightly decreased            |                               |
|                                                                                                                                                                        | 2                            | moderately decreased          |                               |
|                                                                                                                                                                        | 3                            | severely decreased            |                               |
| <b>Appetite</b>                                                                                                                                                        | 0                            | normal                        |                               |
|                                                                                                                                                                        | 1                            | slightly decreased            |                               |
|                                                                                                                                                                        | 2                            | moderately decreased          |                               |
|                                                                                                                                                                        | 3                            | severely decreased            |                               |

|                                     |   |                                                      |                    |
|-------------------------------------|---|------------------------------------------------------|--------------------|
| <b>Vomiting</b>                     | 0 | normal                                               |                    |
|                                     | 1 | mild (1x per week)                                   |                    |
|                                     | 2 | moderate (2-3x per week)                             |                    |
|                                     | 3 | severe (>3x per week)                                |                    |
| <b>Stool consistency</b>            | 0 | normal                                               |                    |
|                                     | 1 | slightly soft feces, or fecal blood, mucus, or both  | (please circle)    |
|                                     | 2 | very soft feces                                      |                    |
|                                     | 3 | watery diarrhea                                      |                    |
| <b>Stool frequency</b>              | 0 | normal                                               |                    |
|                                     | 1 | slightly increased (2–3× per day)                    |                    |
|                                     | 2 | moderately increased (4–5× per day)                  |                    |
|                                     | 3 | severely increased (>5× per day)                     |                    |
| <b>Weight loss</b>                  | 0 | none                                                 |                    |
|                                     | 1 | mild (<5%)                                           | loss: _____ lbs/kg |
|                                     | 2 | moderate (5–10%)                                     |                    |
|                                     | 3 | severe (>10%)                                        |                    |
| <b>Albumin concentration</b>        | 0 | Albumin >20 g/L                                      |                    |
|                                     | 1 | Albumin 15–19.9 g/L                                  |                    |
|                                     | 2 | Albumin 12–14.9 g/L                                  |                    |
|                                     | 3 | Albumin <12 g/L                                      |                    |
| <b>Ascites and peripheral edema</b> | 0 | none                                                 |                    |
|                                     | 1 | mild ascites or peripheral edema                     |                    |
|                                     | 2 | moderate amount of ascites/peripheral edema          |                    |
|                                     | 3 | severe ascites/pleural effusion and peripheral edema |                    |

|                 |   |                                                               |                            |
|-----------------|---|---------------------------------------------------------------|----------------------------|
| <b>Pruritus</b> | 0 | no pruritus                                                   | Changes in hair/coat/skin? |
|                 | 1 | occasional episodes of itching                                |                            |
|                 | 2 | regular episodes of itching, but stops when the dog is asleep |                            |
|                 | 3 | dog regularly wakes up because of itching                     |                            |

Additional parameters

|                     |  |                      |  |
|---------------------|--|----------------------|--|
| <b>Water intake</b> |  | normal               |  |
|                     |  | decreased            |  |
|                     |  | moderately increased |  |
|                     |  | severely increased   |  |

|                         |  |                      |  |
|-------------------------|--|----------------------|--|
| <b>Urination amount</b> |  | normal               |  |
|                         |  | decreased            |  |
|                         |  | moderately increased |  |
|                         |  | severely increased   |  |

|                   |  |          |  |
|-------------------|--|----------|--|
| <b>Flatulence</b> |  | normal   |  |
|                   |  | mild     |  |
|                   |  | moderate |  |
|                   |  | severe   |  |

**Medical history**

|                                                                                                 |  |
|-------------------------------------------------------------------------------------------------|--|
| When was the first time of clinical signs?                                                      |  |
| How long has this patient had the clinical signs?                                               |  |
| Was this patient on any immunosuppressive drugs at the time of sample collection?               |  |
| Please list all immunosuppressive drugs given up to 6 months prior.                             |  |
| Was this patient on any antibiotic drugs before/at the time of sample collection?               |  |
| Please list all antibiotics given up to 6 months prior to sample collection.                    |  |
| Please tell us about cobalamin supplementation given up to 6 months prior to sample collection. |  |

|                                                                                                                                                      |                                                                                                                                                                                   |
|------------------------------------------------------------------------------------------------------------------------------------------------------|-----------------------------------------------------------------------------------------------------------------------------------------------------------------------------------|
| Please list all additional medications given 6 months prior to the sample collection.                                                                |                                                                                                                                                                                   |
| <b>Vomiting</b>                                                                                                                                      |                                                                                                                                                                                   |
| Is your dog vomiting?                                                                                                                                | <input type="checkbox"/> yes <input type="checkbox"/> no                                                                                                                          |
| If yes, since when?                                                                                                                                  |                                                                                                                                                                                   |
| How often (how many times per day, week or month)?                                                                                                   |                                                                                                                                                                                   |
| When does it occur (after eating, or unrelated to feeding)?                                                                                          |                                                                                                                                                                                   |
| What does the vomited material look like (digested or undigested food, foamy, yellowish/green, red/fresh blood, "coffee grounds" appearance, other)? |                                                                                                                                                                                   |
| <b>Diarrhea</b>                                                                                                                                      |                                                                                                                                                                                   |
| Does your dog have diarrhea?                                                                                                                         | <input type="checkbox"/> yes <input type="checkbox"/> no                                                                                                                          |
| If yes, since when?                                                                                                                                  |                                                                                                                                                                                   |
| Is the diarrhea persistent (constant) or intermittent (does it go away sometimes)?                                                                   |                                                                                                                                                                                   |
| How many times per day does your dog have diarrhea                                                                                                   |                                                                                                                                                                                   |
| What is the character of the stools?                                                                                                                 | <input type="checkbox"/> soft with shape<br><input type="checkbox"/> soft without shape ("cow-patty")<br><input type="checkbox"/> watery<br><input type="checkbox"/> other: _____ |
| Is there any mucus, fresh blood, or do the stools appear black or very dark?                                                                         |                                                                                                                                                                                   |
| What is the color of the stool?                                                                                                                      |                                                                                                                                                                                   |
| Is this color normal for your dog?                                                                                                                   |                                                                                                                                                                                   |
| <b>Weight loss</b>                                                                                                                                   |                                                                                                                                                                                   |
| Have you noticed any weight loss?                                                                                                                    | <input type="checkbox"/> yes <input type="checkbox"/> no                                                                                                                          |
| If yes, since when?                                                                                                                                  |                                                                                                                                                                                   |
| If yes, approximately how much?                                                                                                                      |                                                                                                                                                                                   |
| <b>Appetite</b>                                                                                                                                      |                                                                                                                                                                                   |
| Is your dog's appetite reduced?                                                                                                                      | <input type="checkbox"/> yes <input type="checkbox"/> no                                                                                                                          |
| If yes, since when?                                                                                                                                  |                                                                                                                                                                                   |
| Would you describe this as a mild, moderate, or severe reduction?                                                                                    |                                                                                                                                                                                   |

| <b>Activity</b>                                                                                                                      |                                                          |
|--------------------------------------------------------------------------------------------------------------------------------------|----------------------------------------------------------|
| Is your dog lethargic/less active?                                                                                                   | <input type="checkbox"/> yes <input type="checkbox"/> no |
| If yes, since when?                                                                                                                  |                                                          |
| <b>Medical conditions</b>                                                                                                            |                                                          |
| Does your dog currently have any other major medical problems or signs of disease?                                                   |                                                          |
| Has your dog had any other medical problems or signs of disease in the past?                                                         |                                                          |
| <b>Dietary history</b>                                                                                                               |                                                          |
| What kind of food do you currently feed your dog?                                                                                    |                                                          |
| How much and how often do you feed your dog?                                                                                         |                                                          |
| Do you feed your dog any treats?<br>If yes, which ones?                                                                              |                                                          |
| Does your dog receive any supplements (vitamins or other)?<br>If yes, which ones?                                                    |                                                          |
| <b>Medication (incl. preventative drugs and vaccination)</b>                                                                         |                                                          |
| What kind of medications is your dog taking (including monthly preventative medications, such as flea or heartworm prevention etc.)? |                                                          |
| What is your dog's vaccination history (most recent vaccinations)?                                                                   |                                                          |
| <b>Additional information</b>                                                                                                        |                                                          |
| Is there anything else that you would like to add or let us know about?                                                              |                                                          |

**Supplementary Table 2.** Final diagnosis questionnaire for 17 dogs with chronic enteropathy (CE). Information obtained from dogs included in the second part of the study (II) consisted of a questionnaire to be completed by a veterinarian or veterinary staff. Follow-up also included a canine CE clinical activity index (CCECAI<sup>1</sup>) sheet to assess each dog's CCECAI score.

|                                                                                                          |                                                          |
|----------------------------------------------------------------------------------------------------------|----------------------------------------------------------|
| <b>Study ID:</b>                                                                                         | Follow-up date:                                          |
| <b>Concurrent disease(s)</b>                                                                             |                                                          |
| Did your patient have any other major medical problems or signs of disease?                              | <input type="checkbox"/> yes <input type="checkbox"/> no |
| If yes, please specify.                                                                                  |                                                          |
| <b>Elimination diet trial</b>                                                                            |                                                          |
| Did you perform food trials?                                                                             | <input type="checkbox"/> yes <input type="checkbox"/> no |
| If yes, what did you use?                                                                                |                                                          |
| Please specify if a commercial diet was used.                                                            |                                                          |
| Did the food trials alleviate the clinical signs?                                                        |                                                          |
| If yes, what ingredient(s) were eliminated/ may have been associated?                                    |                                                          |
| Did you re-challenge to confirm hypersensitivity?                                                        |                                                          |
| What was the food that the patient responded well too?                                                   |                                                          |
| <b>Antibiotic trial</b>                                                                                  |                                                          |
| Did you prescribe an antibiotic drug?                                                                    | <input type="checkbox"/> yes <input type="checkbox"/> no |
| If yes, did the antibiotic drug alleviate the clinical signs?                                            |                                                          |
| What was the antibiotic drug used, the dosage, and for how long was it administered?                     |                                                          |
| <b>Anti-inflammatory/ immunosuppressive medication</b>                                                   |                                                          |
| Did you prescribe an immunosuppressive drug or anti-inflammatory drug?                                   | <input type="checkbox"/> yes <input type="checkbox"/> no |
| If yes, did the drug(s) alleviate clinical signs?                                                        |                                                          |
| What was/were the immunosuppressive drug(s) and/or anti-inflammatory drug(s), what dosage was/were used? |                                                          |

| <b>Additional follow-up information</b>                                      |  |
|------------------------------------------------------------------------------|--|
| Did you treat sequentially by trying remedies one at a time or all together? |  |
| What was the final or tentative diagnosis for this patient?                  |  |
| When is the last time you saw this patient?                                  |  |
| What was the patient's condition?                                            |  |
| Is there anything else that you would like to add or let us know about?      |  |

**Supplementary Table 3.** Histologic lesion score for 66 dogs with chronic enteropathy.

Listed are the structural and inflammatory lesions that were evaluated on a scale from 0 (normal) to 3 (severely abnormal).<sup>2,3</sup>

| <b>Feature</b>                  | <b>Fundus</b> | <b>Antrum</b> | <b>Duodenum</b> | <b>Ileum</b> | <b>Colon</b> |
|---------------------------------|---------------|---------------|-----------------|--------------|--------------|
| <b>Structural lesions</b>       |               |               |                 |              |              |
| Surface epithelial injury       |               |               |                 |              |              |
| Gastric pit epithelial injury   |               |               |                 |              |              |
| Villus stunting                 |               |               |                 |              |              |
| Crypt dilation/distortion       |               |               |                 |              |              |
| Lacteal dilation                |               |               |                 |              |              |
| Colonic goblet cell numbers     |               |               |                 |              |              |
| Mucosal fibrosis                |               |               |                 |              |              |
| <b>Inflammatory lesions</b>     |               |               |                 |              |              |
| Intraepithelial lymphocytes     |               |               |                 |              |              |
| LP lymphocytes and plasma cells |               |               |                 |              |              |
| LP eosinophils                  |               |               |                 |              |              |
| LP neutrophils                  |               |               |                 |              |              |
| LP macrophages                  |               |               |                 |              |              |
| Lymphoid follicular hyperplasia |               |               |                 |              |              |

LP = lamina propria. Only white cells are relevant criteria for a specific segment.

### References

1. Allenspach K, et al. Chronic enteropathies in dogs: evaluation of risk factors for negative outcome. *J Vet Intern Med* 2007;21:700–708.
2. Day MJ, et al. Histopathological standards for the diagnosis of gastrointestinal inflammation in endoscopic biopsy samples from the dog and cat: a report from the World Small Animal Veterinary Association Gastrointestinal Standardization Group. *J Comp Pathol* 2008;138(Suppl 1):S1–S43.



3. Washabau RJ, et al. Endoscopic, biopsy, and histopathologic guidelines for the evaluation of gastrointestinal inflammation in companion animals. *J Vet Intern Med* 2010;24:10–26.
